# Supplementary material
Source: HighWire-hosted journal article supplement (https://bmjopen.bmj.com/content/13/5/e070883)
Supplement: inline-supplementary-material-1 [file inline-supplementary-material-1.pdf]

1 **SUPPLEMENTAL FILE 1**

2

3 **Table S1.** Model fit statistics of latent classes of unhealthy behaviours among women and men.

| <b>Women</b>                    |                                                                  |                                                   |                                        |                                                                          |                  |                  |                |
|---------------------------------|------------------------------------------------------------------|---------------------------------------------------|----------------------------------------|--------------------------------------------------------------------------|------------------|------------------|----------------|
| <b>Number of latent classes</b> | <b>Class membership based on posterior probabilities, n (%)</b>  | <b>Marginal probabilities of class membership</b> | <b>Average posterior probabilities</b> | <b>Average posterior probabilities of class membership in each class</b> | <b>AIC value</b> | <b>BIC value</b> | <b>Entropy</b> |
| 1                               | 3228 (100)                                                       | 1.0                                               | 1.00                                   | 1.00                                                                     | 16715.2          | 16745.6          | 1.00           |
| 2                               | 2281 (70.7)<br>947 (29.3)                                        | 0.65<br>0.35                                      | 0.87                                   | 0.87<br>0.88                                                             | 16402.5          | 16469.4          | 0.86           |
| 3                               | 2701 (83.7)<br>147 (4.6)<br>380 (11.8)                           | 0.75<br>0.08<br>0.17                              | 0.85                                   | 0.87<br>0.63<br>0.82                                                     | 16366.4          | 16469.8          | 0.86           |
| 4                               | 1881 (58.3)<br>781 (24.2)<br>128 (4.0)<br>438 (13.6)             | 0.57<br>0.21<br>0.07<br>0.15                      | 0.81                                   | 0.87<br>0.71<br>0.66<br>0.75                                             | 16374.7          | 16508.5          | 0.83           |
| 5                               | 1628 (50.4)<br>846 (26.2)<br>199 (6.2)<br>497 (15.4)<br>58 (1.8) | 0.44<br>0.24<br>0.10<br>0.21<br>0.02              | 0.83                                   | 0.85<br>0.82<br>0.60<br>0.89<br>0.67                                     | 16371.3          | 16535.4          | 0.90           |
| <b>Men</b>                      |                                                                  |                                                   |                                        |                                                                          |                  |                  |                |
| 1                               | 774 (100)                                                        | 1.00                                              | 1.00                                   | 1.00                                                                     | 4723.9           | 4747.2           | 1.00           |
| 2                               | 412 (53.2)<br>362 (46.8)                                         | 0.45<br>0.55                                      | 0.86                                   | 0.78<br>0.94                                                             | 4650.5           | 4701.7           | 0.88           |
| 3                               | 445 (57.5)<br>39 (5.0)<br>290 (37.5)                             | 0.58<br>0.05<br>0.37                              | 0.96                                   | 0.99<br>0.66<br>0.96                                                     | 4643.0           | 4722.1           | 0.98           |
| 4                               | 91 (11.8)<br>421 (54.4)<br>159 (20.5)<br>103 (13.3)              | 0.22<br>0.38<br>0.30<br>0.10                      | 0.76                                   | 0.84<br>0.69<br>0.94<br>0.71                                             | 4648.8           | 4751.1           | 0.83           |
| 5                               | 20 (2.6)<br>171 (22.1)<br>325 (42.0)                             | 0.13<br>1.18<br>0.31                              | 0.71                                   | 0.73<br>0.74<br>0.68                                                     | 4644.5           | 4746.8           | 0.90           |

|  |            |      |      |
|--|------------|------|------|
|  | 167 (21.6) | 0.16 | 0.67 |
|  | 91 (11.8)  | 0.22 | 0.85 |

4 AIC = Akaike Information Criterion, BIC = Bayesian Information Criterion

5

6

7 **Table S2.** Latent class marginal means with 95% confidence intervals (CI) for unhealthy behaviours by latent classes among women and men.

| Unhealthy behaviours within latent classes | Women                  | Men                    |
|--------------------------------------------|------------------------|------------------------|
|                                            | Marginal mean (95% CI) | Marginal mean (95% CI) |
| <b>Class 1</b>                             |                        |                        |
| Low LTPA                                   | 0.13 (0.11-0.15)       | 0.10 (0.06-0.16)       |
| Non-daily F&V consumption                  | 0.13 (0.11-0.16)       | 0.33 (0.26-0.40)       |
| Insufficient sleep                         | 0.31 (0.28-0.33)       | 0.32 (0.26-0.38)       |
| Excessive alcohol use                      | 0.08 (0.03-0.16)       | 0.21 (0.10-0.39)       |
| Tobacco use                                | 0.12 (0.06-0.22)       | 0.00 (0.00-1.00)       |
| <b>Class 2</b>                             |                        |                        |
| Low LTPA                                   | 0.11 (0.07-0.18)       | 0.02 (0.00-0.92)       |
| Non-daily F&V consumption                  | 0.26 (0.19-0.34)       | 0.12 (0.01-0.70)       |
| Insufficient sleep                         | 0.31 (0.24-0.38)       | 0.29 (0.21-0.38)       |
| Excessive alcohol use                      | 0.77 (0.17-0.98)       | 0.99 (0.00-1.00)       |
| Tobacco use                                | 0.69 (0.42-0.87)       | 0.51 (0.40-0.61)       |
| <b>Class 3</b>                             |                        |                        |
| Low physical activity                      | 0.51 (0.27-0.74)       |                        |
| Non-daily F&V consumption                  | 0.63 (0.38-0.83)       |                        |
| Insufficient sleep                         | 0.61 (0.44-0.76)       |                        |
| Excessive alcohol use                      | 0.18 (0.07-0.41)       |                        |
| Tobacco use                                | 0.45 (0.28-0.63)       |                        |

8 F&V = fruit and vegetable, LTPA = leisure-time physical activity

9

10

11 **Table S3.** Sociodemographic characteristics (n, %) of latent classes of unhealthy behaviours among women and men.

| Sociodemographic factors                | Women               |                    |                    | P-value <sup>a</sup> | Men                |                    | P-value <sup>a</sup> |
|-----------------------------------------|---------------------|--------------------|--------------------|----------------------|--------------------|--------------------|----------------------|
|                                         | Class 1<br>(n=2701) | Class 2<br>(n=380) | Class 3<br>(n=147) |                      | Class 1<br>(n=412) | Class 2<br>(n=362) |                      |
| <b>Age</b>                              |                     |                    |                    | <0.001               |                    |                    | 0.098                |
| 19–29 years                             | 827 (30.6)          | 176 (46.3)         | 46 (31.3)          |                      | 93 (22.6)          | 104 (28.7)         |                      |
| 30–34 years                             | 943 (34.9)          | 119 (31.3)         | 46 (31.3)          |                      | 134 (32.5)         | 118 (32.6)         |                      |
| 35–39 years                             | 931 (34.5)          | 85 (22.4)          | 55 (37.4)          |                      | 185 (44.9)         | 140 (38.7)         |                      |
| <b>Marital status</b>                   |                     |                    |                    | <0.001               |                    |                    | <0.001               |
| Married or cohabiting                   | 1857 (68.8)         | 174 (45.8)         | 91 (61.9)          |                      | 328 (79.6)         | 242 (66.9)         |                      |
| Other                                   | 844 (31.3)          | 206 (54.2)         | 56 (38.1)          |                      | 84 (20.4)          | 120 (33.2)         |                      |
| <b>Children living in the household</b> |                     |                    |                    | <0.001               |                    |                    | <0.001               |
| No                                      | 1471 (54.5)         | 305 (80.3)         | 75 (51.0)          |                      | 223 (54.1)         | 244 (67.4)         |                      |
| Yes                                     | 1230 (45.5)         | 75 (19.7)          | 72 (49.0)          |                      | 189 (45.9)         | 118 (32.6)         |                      |
| <b>Occupational class</b>               |                     |                    |                    | <0.001               |                    |                    | <0.001               |
| Managers and professionals              | 802 (29.7)          | 71 (18.7)          | 22 (15.0)          |                      | 154 (37.4)         | 87 (24.0)          |                      |
| Semi-professionals                      | 1167 (43.2)         | 173 (45.5)         | 62 (42.2)          |                      | 129 (31.3)         | 113 (31.2)         |                      |
| Routine non-manual workers              | 665 (24.6)          | 123 (32.4)         | 55 (37.4)          |                      | 88 (21.4)          | 103 (28.5)         |                      |
| Manual workers                          | 67 (2.5)            | 13 (3.4)           | 8 (5.4)            |                      | 41 (10.0)          | 59 (16.3)          |                      |

12 <sup>a</sup>P-values from Chi-Square Tests.

13

14

15 **Table S4.** Characteristics of all participants who responded to the Helsinki Health Study survey (2017), of those who gave their written consent to register  
16 linkages, of those who were excluded from this study <sup>a</sup>, and of those who were finally included in this study.

|                                                                                                              | All participants who responded to the survey<br>(n=5898) | Participants who gave their consent to register linkages (n=4864) | Excluded telephone interviewees <sup>a</sup><br>(n=651) | Other excluded participants <sup>a</sup><br>(n=211) | Participants in this study<br>(n=4002) |
|--------------------------------------------------------------------------------------------------------------|----------------------------------------------------------|-------------------------------------------------------------------|---------------------------------------------------------|-----------------------------------------------------|----------------------------------------|
| <b>Total number of sickness absence days during the follow-up <sup>b</sup>, median (interquartile range)</b> | Not available.                                           | 11 (25)                                                           | 8 (24)                                                  | 9 (29)                                              | 12 (26)                                |
| <b>Health behaviours</b>                                                                                     |                                                          |                                                                   |                                                         |                                                     |                                        |

|                                    |             |             |            |            |             |
|------------------------------------|-------------|-------------|------------|------------|-------------|
| <b>Fresh vegetable consumption</b> |             |             |            |            |             |
| Daily                              | 4119 (70.1) | 3443 (71.1) | 493 (75.9) | 141 (67.1) | 2809 (70.5) |
| Non-daily                          | 1755 (29.9) | 1401 (28.9) | 157 (24.2) | 69 (32.9)  | 1175 (29.5) |
| <b>Sleep (hours)</b>               |             |             |            |            |             |
| 7–9 hours                          | 4573 (78.0) | 3799 (78.6) | 493 (75.7) | 159 (76.4) | 3147 (79.2) |
| <7 or >9 hours                     | 1287 (22.0) | 1035 (21.4) | 158 (24.3) | 49 (23.6)  | 828 (20.8)  |
| <b>Alcohol use <sup>c</sup></b>    |             |             |            |            |             |
| Once a week or less                | 5058 (88.9) | 4153 (88.4) | 610 (93.7) | 179 (88.2) | 3364 (87.5) |
| More than once a week              | 630 (11.1)  | 545 (11.6)  | 41 (6.3)   | 24 (11.8)  | 480 (12.5)  |
| <b>Smoking <sup>d</sup></b>        |             |             |            |            |             |
| No                                 | 4480 (76.5) | 3707 (76.7) | 518 (79.7) | 153 (73.6) | 3036 (76.4) |
| Currently or occasionally          | 1378 (23.5) | 1126 (23.3) | 132 (20.3) | 55 (26.4)  | 939 (23.6)  |
| <b>Sociodemographic factors</b>    |             |             |            |            |             |
| <b>Gender</b>                      |             |             |            |            |             |
| Woman                              | 4630 (78.5) | 3848 (79.1) | 461 (70.8) | 159 (75.4) | 3228 (80.7) |
| Man                                | 1267 (21.5) | 1016 (20.9) | 190 (29.2) | 52 (24.6)  | 774 (19.3)  |
| <b>Age</b>                         |             |             |            |            |             |
| 19–29 years                        | 1864 (31.7) | 1532 (31.5) | 204 (31.3) | 82 (38.9)  | 1246 (31.1) |
| 30–34 years                        | 2000 (34.0) | 1658 (34.1) | 225 (34.6) | 73 (34.6)  | 1360 (34.0) |
| 35–39 years                        | 2023 (34.4) | 1674 (34.4) | 222 (34.1) | 56 (26.5)  | 1396 (34.9) |
| <b>Marital status</b>              |             |             |            |            |             |
| Married or cohabiting              | 3910 (66.3) | 3248 (66.8) | 427 (65.6) | 129 (61.1) | 2692 (67.3) |
| Other                              | 1988 (33.7) | 1616 (33.2) | 224 (34.4) | 82 (38.9)  | 1310 (32.7) |
| <b>Occupational class</b>          |             |             |            |            |             |
| Managers and professionals         | 1552 (27.1) | 1346 (27.7) | 165 (25.3) | 45 (21.4)  | 1136 (28.4) |
| Semi-professionals                 | 2233 (38.9) | 1937 (39.8) | 202 (31.0) | 91 (43.1)  | 1644 (41.1) |
| Routine non-manual workers         | 1612 (28.1) | 1309 (26.9) | 219 (33.6) | 56 (26.5)  | 1034 (25.8) |
| Manual workers                     | 338 (5.9)   | 272 (5.6)   | 65 (10.0)  | 19 (9.0)   | 188 (4.7)   |

17 <sup>a</sup> Of all participants who gave their written consent to register linkages, this study excluded 1) telephone interviewees (n=651), 2) participants who had missing  
18 data on working time (n=33) after the data collection or on all health behaviours of interest (n=1), or 3) who had extreme values in health behaviours—that is,  
19 spending >24 hours together for leisure-time physical activity, sitting, and sleeping (n=166), or reporting >300 metabolic equivalent task -hours for leisure-  
20 time physical activity (n=11).

- 21 <sup>b</sup> The follow-up began from one day after receiving the completed survey questionnaire from a participant and continued until 31<sup>st</sup> March 2020 or until the end  
22 of one's employment contract, whichever came first.
- 23 <sup>c</sup> Participants were asked to estimate the frequency they currently use beer, wine, and spirits. The question included 10 alternatives from "never" to "daily or  
24 almost daily".
- 25 <sup>d</sup> Smoking included only cigarettes (not e-cigarettes or snus).

26

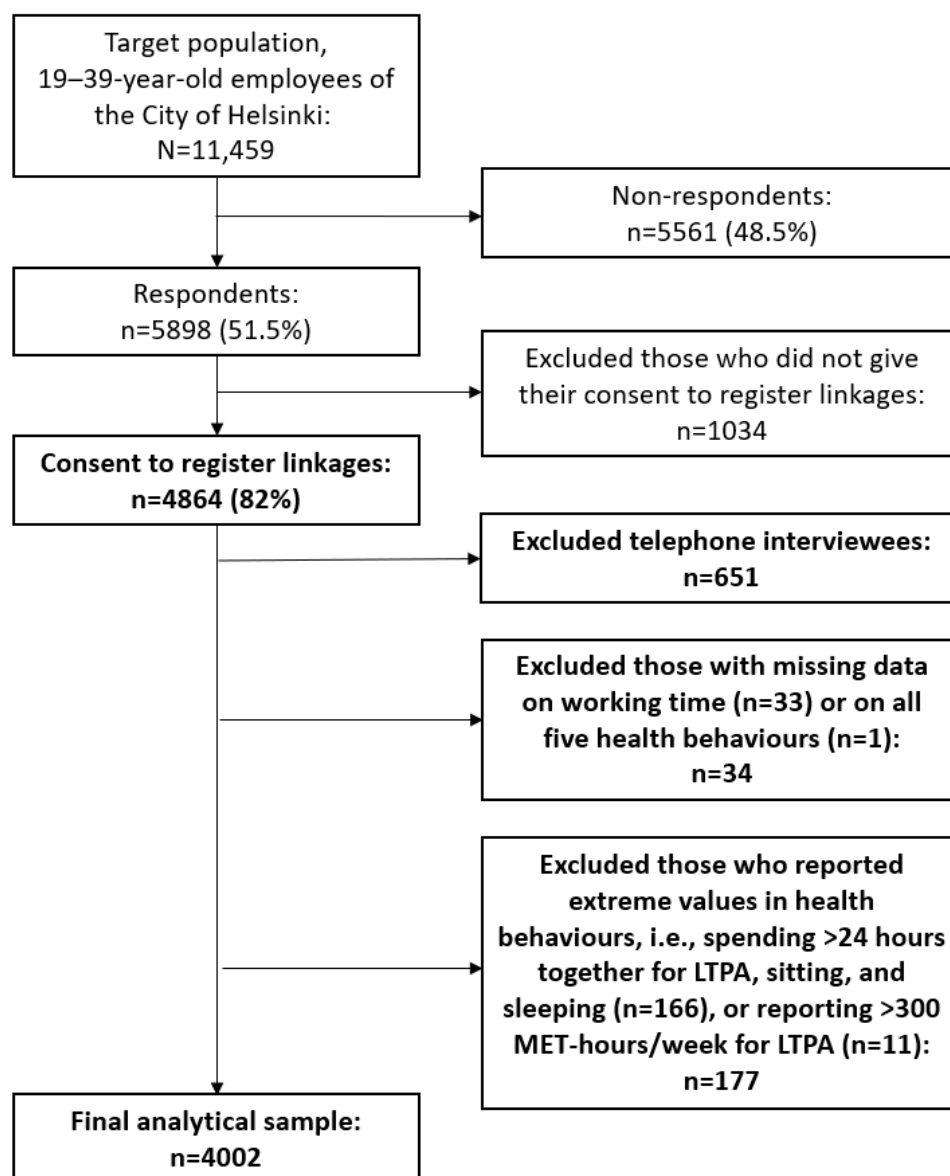

27

28

**Figure S1.** Flow chart: selection of the final analytical study sample.

29

LTPA = leisure-time physical activity, MET = metabolic equivalent task
